# Supplementary material
Source: PubMed Central journal article supplement (PMC11028732)
Supplement: 262_2012_1381_MOESM1_ESM.pdf [file 262_2012_1381_MOESM1_ESM.pdf]

# Supplementary figure 1

## A

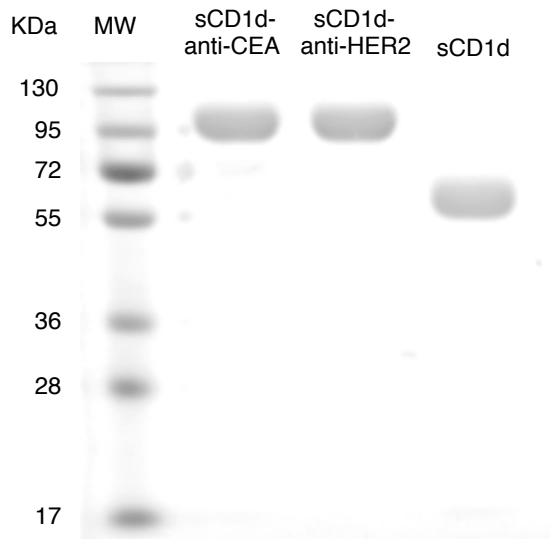

## B

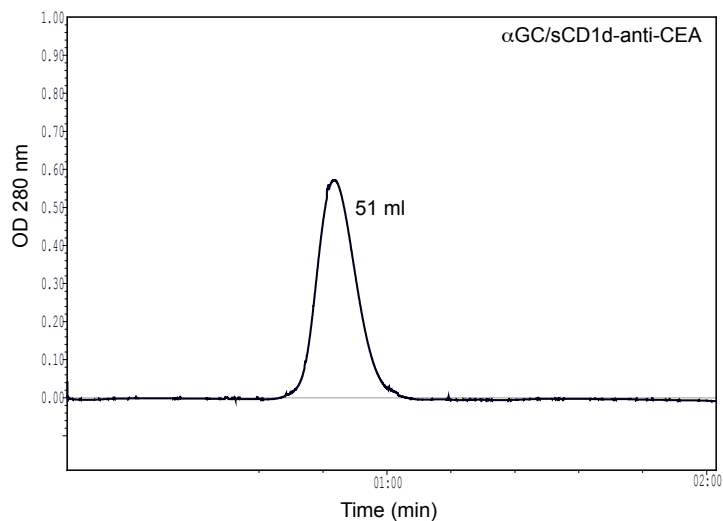

## C

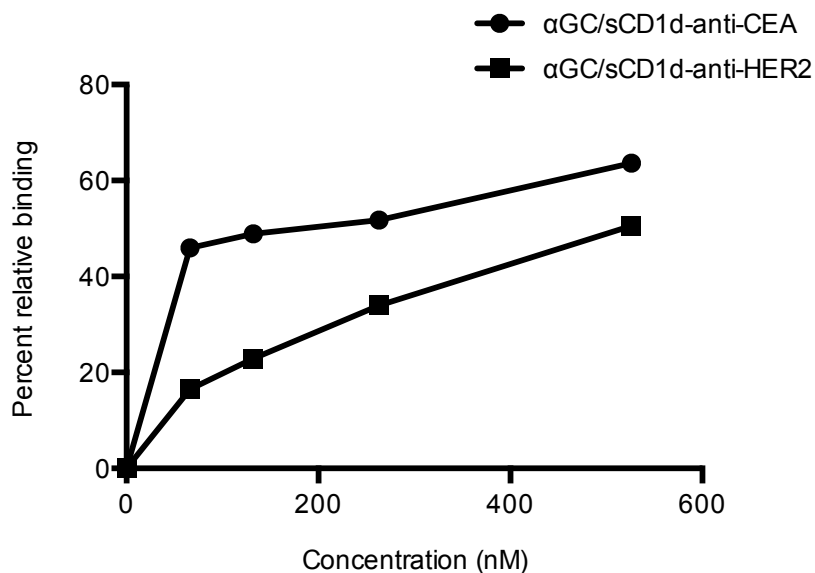

**Supplementary Fig 1.** Characterization of the CD1d-anti-CEA fusion protein. **A** The purities of sCD1d fusion proteins are shown in a 10% SDS-PAGE after purification by Ni-NTA chromatography and **B** FPLC Sephacryl S100 profile after loading with αGC. **C** Titration of the binding of the sCD1d-anti-HER2 or sCD1d-anti-CEA on B16-HER2 or B16-CEA cells. Data are displayed as the relative percentage of the binding of the respective full anti-HER2 Herceptin or anti-CEA antibodies. Detection was performed using anti-CD1d-FITC and anti-human IgG FITC, respectively. For detail methods see Stirnemann et al, JCI, 2008 (Reference 19).

# Supplementary figure 2

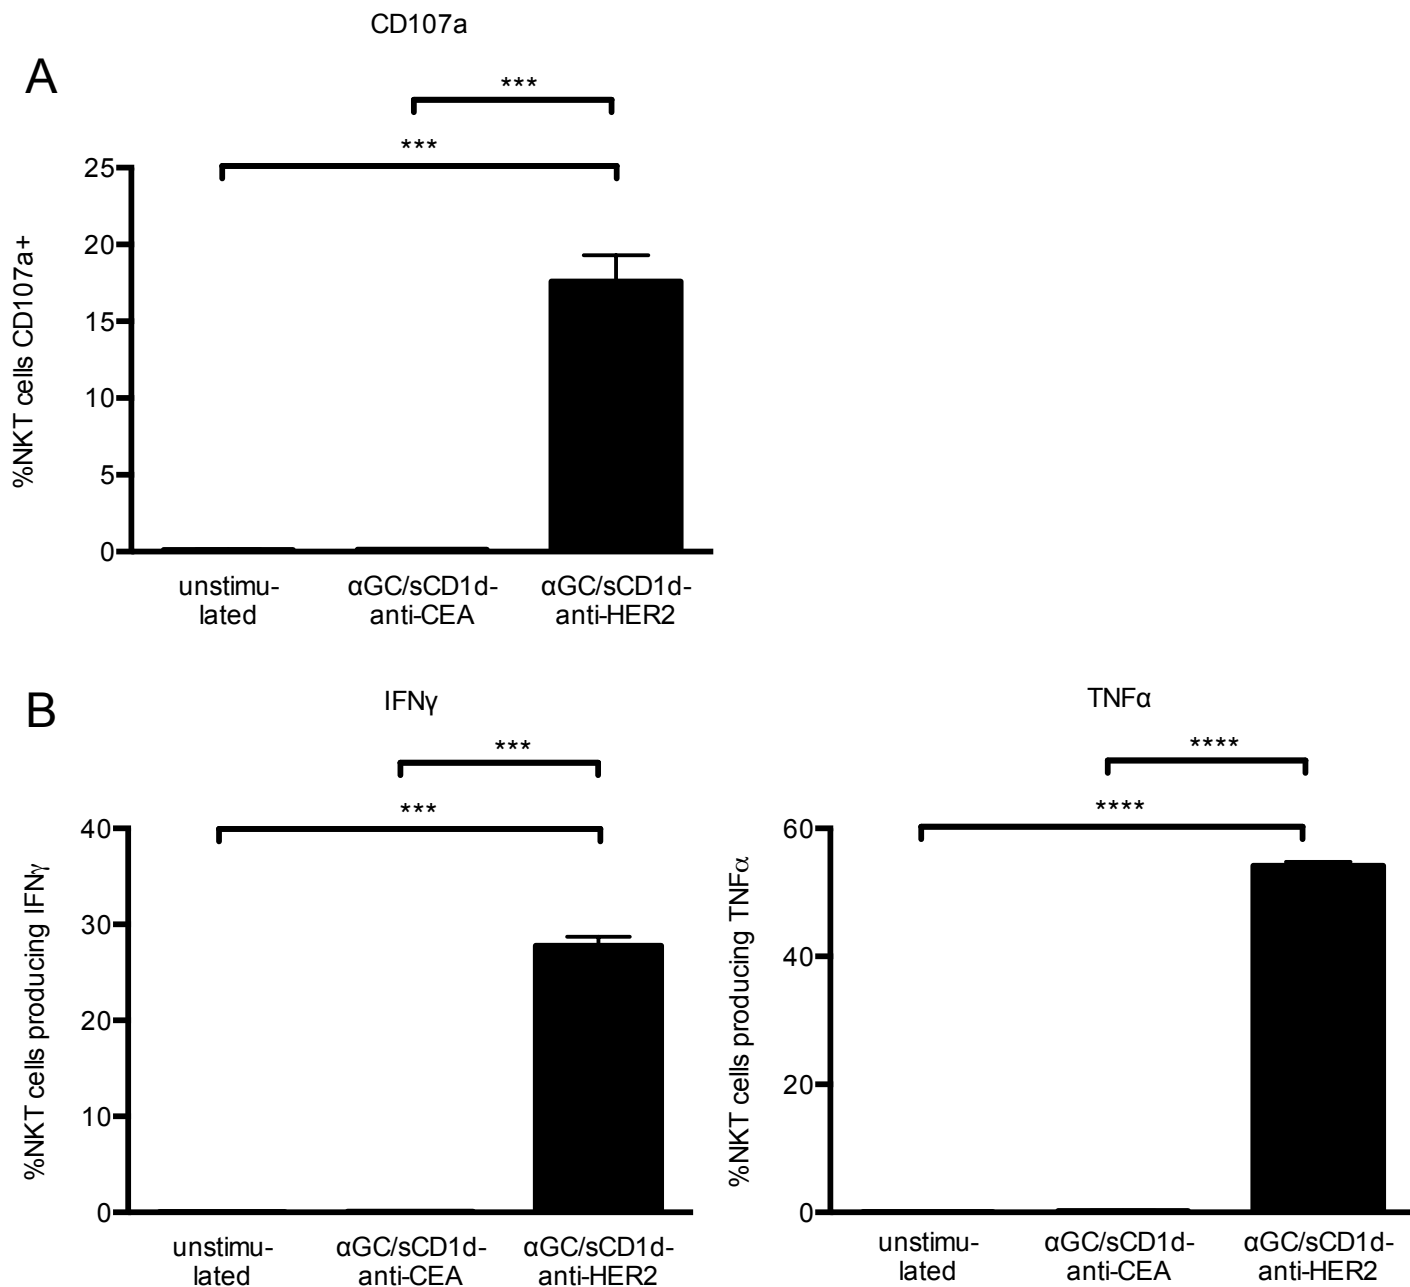

**Supplementary Fig 2.** The activation state of iNKT cells with either targeted or non-targeted fusion proteins. iNKT cell clones were incubated for four hours with SKBR3 tumor cells alone or in the presence of  $\alpha$ GC/sCD1d-CEA or  $\alpha$ GC/sCD1d-HER2. Results are shown as percentages of CD3<sup>+</sup>CD1d-tetramer<sup>+</sup> effector cells expressing CD107a (A), IFN $\gamma$  and TNF $\alpha$  (B). \*\*\* $P$ <0.001, \*\*\*\* $P$ <0.0001. A detail description can be found in the materials and methods section.

# Supplementary figure 3

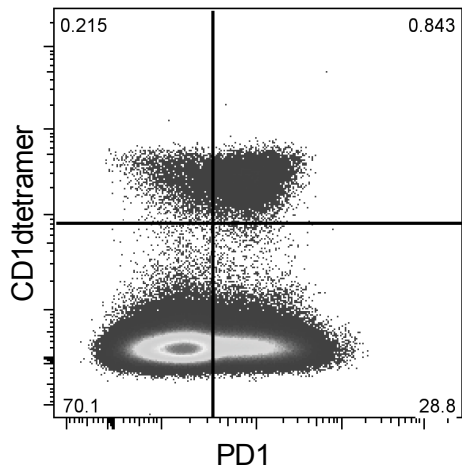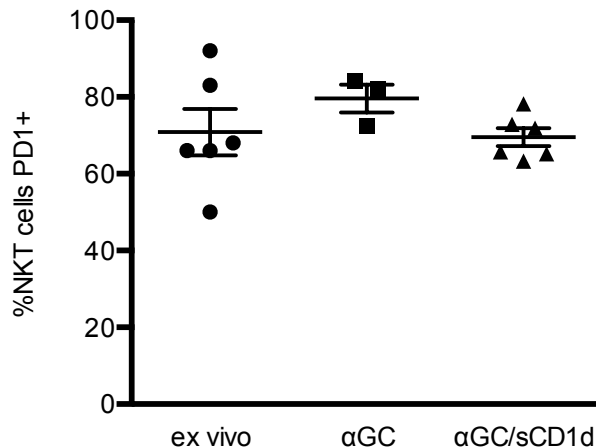

**Supplementary Fig 3.** Expression of PD1 on human iNKT cell lines. Human PBMCs were stimulated as described in Fig 1. iNKT cells were labeled with human anti-PD1 antibody and analyzed with a LSRII (BD Biosciences) and the acquired data were processed using FlowJo software (Tree Star Inc.).
